# Supplementary material
Source: PubMed Central journal article supplement (PMC7229963)
Supplement: mmc1.pdf [file mmc1.pdf]

# Impact of the SARS-CoV-2 epidemic on the Italian Gastroenterology departments.

*Dear colleague, we are aware of the efforts of all healthcare personnel actively engaged in dealing with the COVID-19 emergency in Italy and how time is currently as precious as ever.*

*In the same way, we believe it is important to know the impact that the SARS-CoV epidemic is having on the Italian Gastroenterology departments. Therefore, we ask you to fill in this quick multiple-choice survey that will take only 3 minutes of your time. We thank you in advance and wish you a good job!*

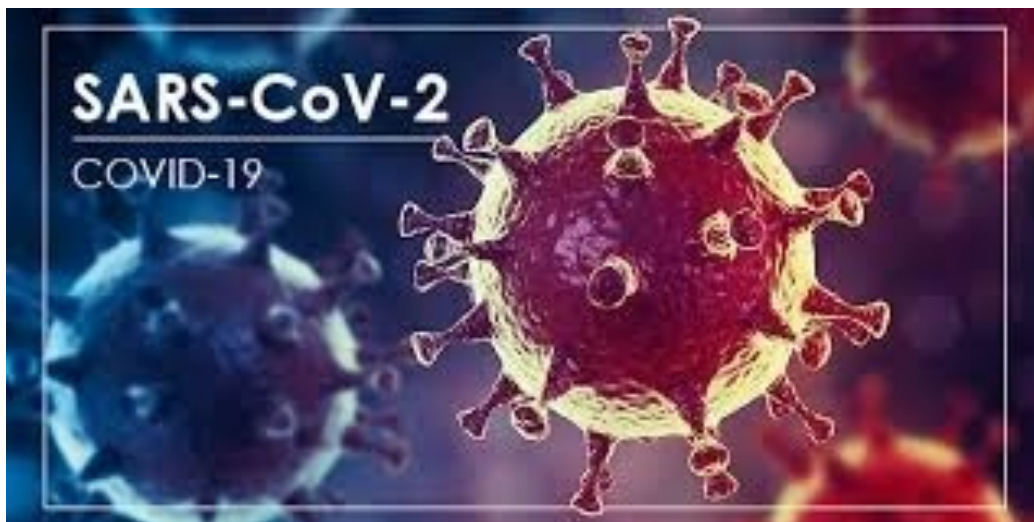

*\*mandatory field*

1. By continuing with this interview, I give my consent to save and use the data provided for scientific and research purposes. \*

- I agree
- I don't agree (end of survey)

2. Do you work in a Gastroenterology department? \*

- Yes
- No

3. Sex \*

- Male
- Female

4. Please enter your age\*

\_\_\_\_\_

5. Work setting\*

- University Hospital
- Non-university hospital
- Private hospital affiliated with the NHS
- Private hospital not affiliated with the NHS
- Other: \_\_\_\_\_

6. Name of the hospital\*

\_\_\_\_\_

7. City\*

\_\_\_\_\_

8. Details of your qualifications: \*

- Director
- University Professor
- University researcher
- Specialist doctor with permanent contract
- Specialist doctor with fixed-term contract
- Medical specialist with freelance contract
- Resident doctor
- Nurse

9. Activities carried out within your Department (before the SARS-CoV-2 epidemic) \*

*\* single or multiple options are allowed*

- Gastroenterology ward
- Day Hospital/Day Service
- Endoscopy
- Ultrasound
- Outpatient clinic
- Other:

10. Has the department in which you work undergone organizational restructuring after the SARS-Co 2 epidemic? \*

*\* single or multiple options are allowed*

- No, the department continues its activities maintaining the same number of services / hospitalizations
- Yes, the department continues its activities but with a drastic reduction in the number of services/hospitalizations
- Yes, the department has been converted to a COVID-19 patient care unit

11. Has your clinical activity been or will it be rescheduled in relation to the emergency? \*

- No
- Yes, I was reallocated to support colleagues in COVID units
- Yes, I was reallocated to support colleagues in medicine department
- Yes, I was reallocated to Emergency departement
- I am waiting for new provisions

12. What changes have the outpatient activities undergone? \*

- No variations
- The activities have been reduced and limited to emergencies and cancer patients
- The activities have been suspended

13. If outpatient access has been reduced, what activities are still carried out?\*

*\* single or multiple options are allowed*

- Oncological Outpatient Clinic (e.g. HCC, CCC, CCR)
- IBD outpatient clinics IBD (physical examination)
- IBD outpatient clinics IBD (infusion treatments)
- Hepatology outpatient clinics (physical examination)
- Hepatology outpatient clinics (antiviral treatments)
- Other: \_\_\_\_\_

14. Has a remote consultancy assistance activity been arranged for the patients in charge? \*

*\* single or multiple options are allowed*

- Yes
- No

15. If the previous answer is yes, what kind of remote consultancy has been activated?

- Telephone availability limited to urgencies
- Scheduled telephone consultation with medical tests checking
- Scheduled video consultation with medical tests checking
- Email consulting
- Other: \_\_\_\_\_

16. What changes has endoscopic activity undergone?\*

- Endoscopic activity did not change
- Endoscopic activity has been reduced, but urgent procedure or on cancer patients are still guaranteed
- Endoscopic activity has been suspended
- In my department we do not routinely perform endoscopic activities

17. If the endoscopic activity has been reduced, what percentage of reduction has it undergone (approximately)?

- <30%
- 30-60%
- 60-90%
- >90%
- N.A.

18. Is endoscopic screening for colorectal cancer prevention still continued?

- Yes
- No
- In my department we do not routinely carried out endoscopic screening for colorectal cancer

19. Have you also perceived a reduction in the number of requests of urgent endoscopic examinations?

- Yes
- No

20. What changes has ultrasound activity undergone? \*

- The ultrasound activity has not undergone any changes
- Ultrasound activity has been reduced, but both urgent and on cancer patients examinations are still guaranteed
- Ultrasound activity has been suspended
- In my department we do not routinely carried out ultrasound activity

21. If the ultrasound activity has been reduced, what percentage reduction has it undergone (approximately)?
- <30%
  - 30-60%
  - 60-90%
  - >90%
  - N.A.
22. Are patients who perform outpatient services (visits, ultrasound, endoscopy, etc) undergo a preliminary triage for risk stratification of exposure/SARS-CoV-2 infection?\*
- Yes, since the beginning of the epidemic (end of February 2020)
  - Yes, but only for a few weeks (after the ministerial decree on 11 March 2020)
  - No
23. Is body temperature always measured during triage?\*
- Yes
  - No



24. Are patients who perform outpatient services (visits, ultrasounds, endoscopic examinations, etc.) undergo containment measures before entering the department?\*

*\* single or multiple options are allowed*

- All patients wear surgical mask and gloves
- Entry is forbidden for accompanying persons
- The stay of patients in waiting rooms is limited (e.g. you receive by appointment)
- Other: \_\_\_\_\_

25. Do medical and nursing staff have PPE (personal protective equipment)?\*

- Yes, in sufficient quantity for daily replacement
- Yes, but in insufficient quantity for the daily change
- No

26. What type of PPE are currently supplied?\*

*\* single or multiple options are allowed*

- Hair cap
- Glasses
- Protective visor
- Disposable gowns Surgical mask
- FFP2 mask
- FFP3 o N95 mask
- Boots
- Disposable gloves
- Other: \_\_\_\_\_

27. During the endoscopic examinations performed on patients with SARS-CoV-2 infection, are the personal protective equipment suggested by the current recommendations always and correctly used?
- Yes, only for COVID-19 positive patients
  - Yes, only for positive and suspect COVID-19 patients
  - Yes, for all patients
  - No, there is no adequate availability
28. Has a specific training been carried out for the management of personal protective equipment? \*
- Yes, a training organized by my facility has been performed
  - Yes, but the training was carried out independently
  - No
29. Has the administration issued a protocol/procedure for the hospital management of patients with suspicion of SARS-CoV-2 infection? \*
- Yes
  - No
30. Is there a dirty-clean path inside your department? \*
- Yes
  - No

31. Is a periodic and constant sanitization of the work environments performed? \*

- Yes
- Yes, but only after then a suspected/infected patient entered the department
- No

32. Are health workers who come into contact with infected patients in your hospital subjected to a swab? \*

- Yes, always
- Yes, but only if symptomatic
- No

33. How many health professionals working within your department have tested positive for SARS-CoV-2? \*

Please enter a whole number:

---

34. What is the perception of the risk of being infected during your work based on the type of PPE available? \*

1 2 3 4 5 6 7 8 9 10

---

Low

very high

35. Do you feel confident working in the current conditions? \*

1 2 3 4 5 6 7 8 9 10

not at all

very safe

36. What is your degree of work stress following the beginning of the epidemic?

1 2 3 4 5 6 7 8 9 10

Minimum

maximum

37. Has your professional exposure brought about changes in your family life? \*

- Yes, I moved away from my family
- Yes, I always live in my home, but I have separated my environments from those of other cohabitants
- I continue my previous habits, but I pay more attention to hygiene
- I continue my previous habits, without any variation

38. What degree of stress/concern does your family experience as a consequence of your professional exposure? \*

1 2 3 4 5 6 7 8 9 10

Minimum

maximum

39. Do you think that the current reduction in gastroenterological care will have an impact on the health of your patients in the coming months? \*

- Yes, remarkable
- Yes, but negligible
- No
- I do not know
